# Supplementary figures and images for: Split-type photoelectrochemical biosensing for miRNA-144 assay based on a ZnIn2S4/TiO2 heterojunction
Source: Royal Society of Chemistry journal article supplement (doi:10.1039/d5tb00553a), 2025-01-01

| 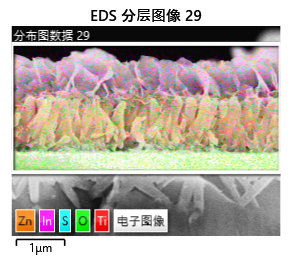 | 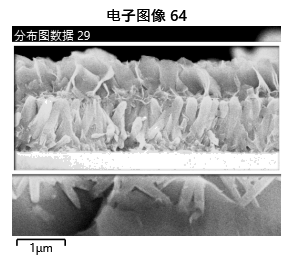 |
| --- | --- |


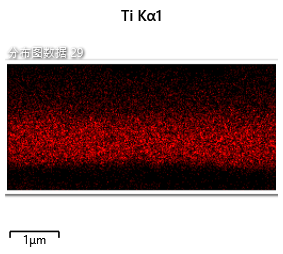

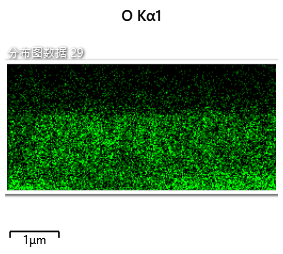

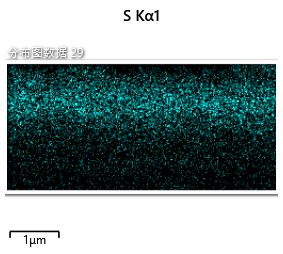

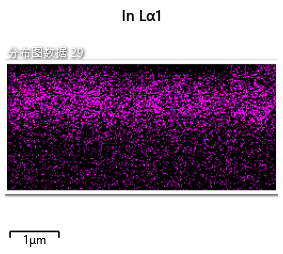

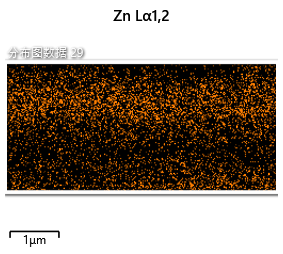


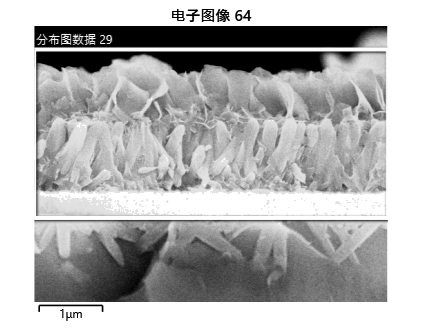

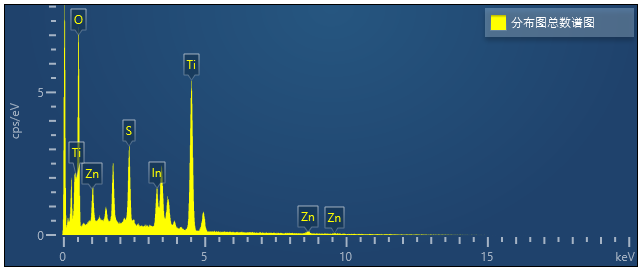


| **分布图总数谱图** | | |
| --- | --- | --- |
| 元素 | Wt% | At% |
| O | 44.96 | 72.58 |
| S | 5.67 | 4.57 |
| Ti | 34.04 | 18.35 |
| Zn | 6.16 | 2.44 |
| In | 9.17 | 2.06 |
| 总量： | 100.00 | 100.00 |

Supplement: d5tb00553a1.zip [file d5tb00553a1.zip]
